# Supplementary material for: Mutant IDH1 Differently Affects Redox State and Metabolism in Glial Cells of Normal and Tumor Origin
Source: MDPI journal article supplement (doi:10.3390/cancers11122028), 2019-12-16
Supplement: s1 [file s1]

# Mutant IDH1 differently affects redox-state and metabolism in glial cells of normal and tumor origin

Biedermann, Julia<sup>1</sup>; Preussler, Matthias<sup>1</sup>; Conde, Marina<sup>2</sup>; Peitzsch, Mirko<sup>3</sup>; Richter, Susan<sup>3</sup>; Wiedemuth, Ralf<sup>2</sup>; Abou-El-Ardat, Khalil<sup>1</sup>; Krüger, Alexander<sup>1,4,5,6</sup>; Meinhardt, Matthias<sup>7</sup>; Schackert Gabriele<sup>2,5,6</sup>; Leenders, William P.<sup>8</sup>; Herold-Mende, Christel<sup>9</sup>; Niclou, Simone P.<sup>11</sup>; Bjerkvig, Rolf<sup>11,12</sup>; Eisenhofer, Graeme<sup>3,10</sup>; Temme, Achim<sup>2,5,6</sup>; Seifert, Michael<sup>5,13</sup>; Kunz-Schughart, Leoni A.<sup>4,5</sup>; Schröck, Evelin<sup>1,5,6</sup>; Klink, Barbara<sup>1,5,6,14\*</sup>

<sup>1</sup> Institute for Clinical Genetics, Faculty of Medicine Carl Gustav Carus, Technische Universität Dresden, Fetscherstraße 74, 01307 Dresden, Germany, Evelin.Schrock@tu-dresden.de

<sup>2</sup> Department of Neurosurgery, University Hospital Carl Gustav Carus, Technische Universität Dresden, 01307 Dresden, Germany, Achim.Temme@ukdd.de, Gabriele.Schackert@ukdd.de

<sup>3</sup> Institute of Clinical Chemistry and Laboratory Medicine, University Hospital Carl Gustav Carus, Technische Universität Dresden, 01307 Dresden, Germany, Susan.Richter@ukdd.de

<sup>4</sup> OncoRay - National Center for Radiation Research in Oncology, Faculty of Medicine and University Hospital Carl Gustav Carus, Technische Universität Dresden and Helmholtz-Zentrum Dresden-Rossendorf, 01307 Dresden, Germany, Leoni.Kunz-Schughart@oncoray.de

<sup>5</sup> National Center for Tumor Diseases (NCT), partner site Dresden, Germany

<sup>6</sup> German Cancer Consortium (DKTK), Dresden; German Cancer Research Center (DKFZ), Heidelberg, Germany

<sup>7</sup> Institute for Pathology, University Hospital Carl Gustav Carus, Technische Universität Dresden, 01307 Dresden, Germany, Matthias.Meinhardt@ukdd.de

<sup>8</sup> Department of Biochemistry, Radboud University Medical Center, Nijmegen, The Netherlands, William.Leenders@radboudumc.nl

<sup>9</sup> Experimental Neurosurgery, Department of Neurosurgery, University Hospital Heidelberg, Heidelberg, Germany, h.mende@med.uni-heidelberg.de

<sup>10</sup> Department of Medicine III, University Hospital Carl Gustav Carus, Technische Universität Dresden, 01307 Dresden, Germany, Graeme.Eisenhofer@ukdd.de

<sup>11</sup> Department of Oncology, NorLux Neuro-Oncology Laboratory, Luxembourg Institute of Health (LIH), Luxembourg, Luxembourg, simone.niclou@lih.lu

<sup>12</sup> Department of Biomedicine, University of Bergen, Bergen, Norway, Rolf.Bjerkvig@uib.no

<sup>13</sup> Institute for Medical Informatics and Biometry, Faculty of Medicine Carl Gustav Carus, Technische Universität Dresden, Germany, michael.seifert@tu-dresden.de

<sup>14</sup> National Center of Genetics (NCG), Laboratoire national de santé (LNS), Dudelange, Luxembourg, barbara.klink@Ins.etat.lu

\*Corresponding author. E-mail: Barbara.klink@Ins.etat.lu; Phone: +352 28100 418; Fax: - 441

**Supplementary Tables****Table S1. qPCR Primes for cDNA**

| <b>primer name</b>     | <b>sequence</b>        | <b>product length</b> |
|------------------------|------------------------|-----------------------|
| cNAMPT_Exon1_forward   | GGCAGAAGCCGAGTTCAA     | 82 bp                 |
| cNAMPT_Exon2_reverse   | GCTTGTGTTGGGTGGATATTG  |                       |
| cNAPRT1_Exon11_forward | ACTGGTGCCAATGCCAAT     | 107 bp                |
| cNAPRT1_Exon10_reverse | GGCTGGAGTCAGTCCTCATC   |                       |
| cNmrk1_Exon8_forward   | ATCAGCCTCCAGACTCTCCG   | 125 bp                |
| cNmrk1_Exon9_reverse   | CTCTTCAGATTTTGTTCATCCA |                       |
| cQPRT_Exon2_forward    | GAGGGCTGGTGATGGTGA     | 115 bp                |
| cQPRT_Exon4_reverse    | CTGCATTCCACTTCCACCTT   |                       |
| cARF1_Exon2_forward    | GACCACGATCCTCTACAAGC   | 111 bp                |
| cARF1_Exon3_reverse    | TCCCACACAGTGAAGCTGATG  |                       |
| cGAPDH_Exon6_forward   | ATGTTTCGTCATGGGTGTGAA  | 89 bp                 |
| cGAPDH_Exon7_reverse   | GGTGCTAAGCAGTTGGTGGT   |                       |

**Table S2. Antibodies (Ab) applied for western blotting (WB).**

| <b>Primary Ab</b>   | <b>Clone</b> | <b>Host</b> | <b>Species reactivity*</b> | <b>Distributor</b>          | <b>dilution/working</b> |
|---------------------|--------------|-------------|----------------------------|-----------------------------|-------------------------|
| IDH1 R132H          | H09          | Ms          | H                          | Dianova                     | 1:500                   |
| IDH1                | 2H9          | Ms          | H                          | Abcam                       | 1:2000                  |
| QPRT                | 5D11         | Ms          | H                          | Sigma Aldrich               | 2 µg/ml                 |
| NAPRT1              | n.d.         | Ms          | H                          | Sigma Aldrich               | 2 µg/ml                 |
| HAAO                | n.d.         | Ms          | H                          | Abnova                      | 2 µg/ml                 |
| NAMPT               | P4D5AT       | Ms          | H                          | Enzo Life Science           | 1:2000                  |
| GAPDH               | n.d.         | Ms          | H, B, Gt Ms, Rb, Rt Sw, F  | Meridian Life Science       | 1:20.000                |
| <b>Secondary Ab</b> |              |             |                            |                             |                         |
| Mouse IgG           | n.d.         | Gt          | Ms                         | Santa Cruz<br>Biotechnology | 1:2000                  |

\* species reactivity according to distributor

n.d. - not defined, B – bovine, F-fish, Gt - goat, H- human, Ms - mouse, Rb - rabbit, Rt-Rat, Sw - swine

The primary antibodies were incubated at 4°C over night. The secondary antibody was incubated for 1 hour at room temperature.
